# Supplementary material for: Effects of Electrode Reversal on the Distribution of Naproxen in the Electrospun Cellulose Acetate Nanofibers
Source: Hindawi journal article supplement (doi:10.1155/2014/360658), 2014-01-01
Supplement: f1 [file 360658.f1.docx]

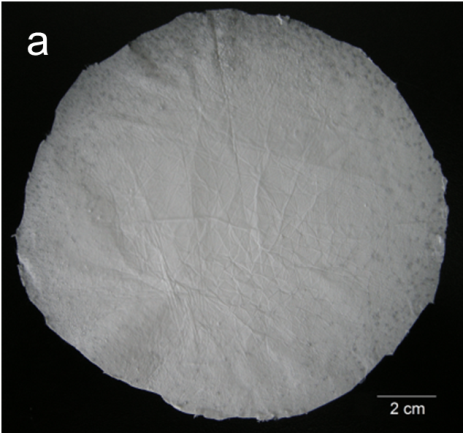

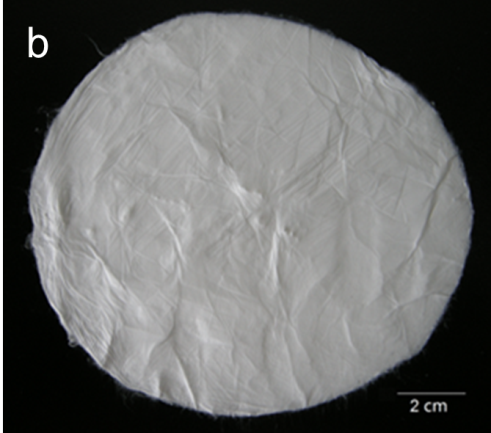


Figure S1. Nanofiber mats prepared by (a) positive and (b) reversed emitting electrode electrospinning.


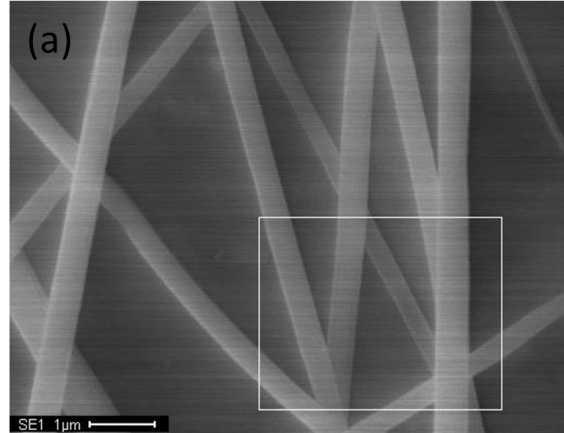

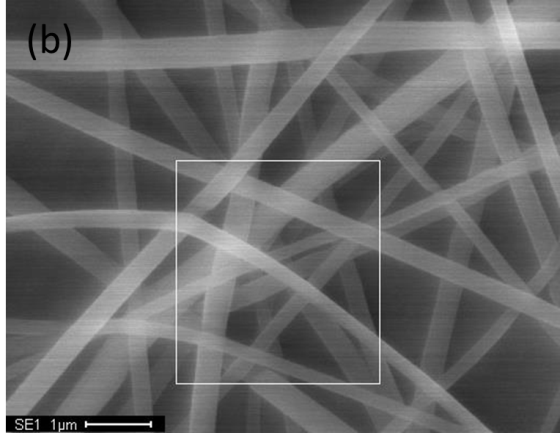


Figure S2. EDS results of different fibers. (a) Fibers from positive setup, (b) fibers from reversed setup, (c) element results with normalized by the intensity of carbon. The white circles in (a) and (b) indicate the selected area for EDS.
